# Supplementary material for: Biological Insights Into Muscular Strength: Genetic Findings in the UK Biobank
Source: PubMed Central journal article supplement (PMC5915424; doi:10.1038/s41598-018-24735-y), 2018-04-24
Supplement: 41598_2018_24735_MOESM1_ESM.pdf [file 41598_2018_24735_MOESM1_ESM.pdf]

## **Supplementary Material**

### **Biological Insights Into Muscular Strength: Genetic Findings in the UK Biobank**

Emmi Tikkanen, Stefan Gustafsson, David Amar, Anna Shcherbina, Daryl Waggott, Euan A.

Ashley, Erik Ingelsson

**Supplementary Table S1. Genetic loci associated with grip strength in discovery and replication datasets.**

| SNP        | CHR | position (GRCh37) | Nearest gene    | Effect allele | Other allele | Discovery |        |        |         | Replication |        |         |
|------------|-----|-------------------|-----------------|---------------|--------------|-----------|--------|--------|---------|-------------|--------|---------|
|            |     |                   |                 |               |              | EAF       | Beta   | Se     | P-value | Beta        | Se     | P-value |
| rs1421085  | 16  | 53800954          | FTO             | C             | T            | 0.4       | -0.004 | 0.0003 | 5.4e-38 | -0.004      | 0.0005 | 4.9e-22 |
| rs12928404 | 16  | 28847246          | ATXN2L          | C             | T            | 0.41      | -0.003 | 0.0003 | 1.0e-25 | -0.002      | 0.0004 | 1.1e-07 |
| rs13107325 | 4   | 103188709         | SLC39A8         | T             | C            | 0.075     | -0.006 | 0.0006 | 4.4e-23 | -0.005      | 0.0008 | 2.0e-10 |
| rs10203386 | 2   | 25136866          | ADCY3           | A             | T            | 0.45      | -0.003 | 0.0003 | 1.6e-20 | -0.003      | 0.0004 | 2.7e-09 |
| rs543874   | 1   | 177889480         | ENSG00000254154 | G             | A            | 0.21      | -0.004 | 0.0004 | 3.8e-20 | -0.003      | 0.0005 | 3.0e-07 |
| rs77226405 | 18  | 58077260          | MC4R            | A             | C            | 0.02      | 0.01   | 0.0011 | 5.4e-19 | 0.007       | 0.0016 | 2.1e-05 |
| rs6752706  | 2   | 629831            | TMEM18          | C             | T            | 0.82      | -0.004 | 0.0004 | 3.9e-18 | -0.003      | 0.0006 | 2.9e-09 |
| rs2744475  | 6   | 50784880          | TFAP2B          | G             | C            | 0.29      | -0.003 | 0.0003 | 6.5e-17 | -0.003      | 0.0005 | 3.9e-09 |
| rs2814949  | 6   | 34656722          | C6orf106        | G             | A            | 0.36      | -0.003 | 0.0003 | 6.8e-17 | -0.002      | 0.0005 | 0.001   |
| rs10871777 | 18  | 57851763          | ENSG00000267620 | G             | A            | 0.24      | -0.003 | 0.0004 | 7.6e-17 | -0.003      | 0.0005 | 7.2e-08 |
| rs3821269  | 2   | 70698590          | TGFA            | G             | A            | 0.5       | 0.002  | 0.0003 | 3.5e-15 | 0.002       | 0.0004 | 0.00038 |
| rs12225051 | 11  | 47571967          | CELF1           | T             | C            | 0.28      | 0.003  | 0.0004 | 7.2e-15 | 0.003       | 0.0005 | 2.2e-08 |
| rs62106258 | 2   | 417167            | LINC01874       | C             | T            | 0.048     | 0.006  | 0.0007 | 3.3e-14 | 0.007       | 0.001  | 1.6e-12 |
| rs3810291  | 19  | 47569003          | ZC3H4           | A             | G            | 0.68      | -0.002 | 0.0003 | 1.3e-13 | -0.002      | 0.0005 | 0.00038 |
| rs1243188  | 10  | 21908803          | MLLT10          | C             | T            | 0.3       | -0.003 | 0.0003 | 1.6e-13 | -0.002      | 0.0005 | 1.1e-06 |
| rs2431112  | 5   | 103931707         | RP11-6N13.1     | A             | G            | 0.44      | -0.002 | 0.0003 | 1.7e-13 | -0.002      | 0.0004 | 2.4e-06 |
| rs10788958 | 1   | 54040670          | GLIS1           | G             | C            | 0.65      | 0.002  | 0.0003 | 1.2e-12 | 0.002       | 0.0005 | 0.001   |
| rs78648104 | 6   | 50683009          | TFAP2D          | C             | T            | 0.086     | 0.004  | 0.0006 | 1.3e-12 | 0.002       | 0.0008 | 0.0016  |
| rs660010   | 18  | 53310969          | TCF4            | C             | G            | 0.14      | 0.003  | 0.0004 | 1.8e-12 | 0.003       | 0.0006 | 9.6e-07 |
| rs13130484 | 4   | 45175691          | ENSG00000248744 | T             | C            | 0.43      | -0.002 | 0.0003 | 2.0e-12 | -0.002      | 0.0004 | 0.00021 |
| rs4549685  | 7   | 39326478          | POU6F2          | T             | C            | 0.33      | 0.002  | 0.0003 | 2.0e-12 | 0.002       | 0.0005 | 8.1e-06 |
| rs17391694 | 1   | 78623626          | RNFT1P2         | T             | C            | 0.14      | -0.003 | 0.0005 | 2.8e-12 | -0.003      | 0.0006 | 1.2e-06 |
| rs6499240  | 16  | 69686912          | NFAT5           | G             | A            | 0.59      | -0.002 | 0.0003 | 3.7e-12 | -0.002      | 0.0004 | 5.6e-08 |
| rs80135947 | 17  | 65836001          | BPTF            | C             | A            | 0.2       | -0.003 | 0.0004 | 4.8e-12 | -0.003      | 0.0006 | 3.7e-09 |
| rs2430740  | 12  | 15041938          | C12orf60        | G             | T            | 0.39      | -0.002 | 0.0003 | 6.0e-12 | -0.002      | 0.0005 | 0.00039 |
| rs2260051  | 6   | 31591918          | PRRC2A          | T             | A            | 0.56      | -0.002 | 0.0003 | 7.1e-12 | -0.002      | 0.0004 | 3.0e-08 |

|             |    |           |                 |   |   |       |        |        |         |        |        |         |
|-------------|----|-----------|-----------------|---|---|-------|--------|--------|---------|--------|--------|---------|
| rs1556659   | 10 | 130834698 | ENSG00000232985 | T | C | 0.38  | 0.002  | 0.0003 | 1.1e-11 | 0.002  | 0.0005 | 4.6e-06 |
| rs7165759   | 15 | 80988600  | ABHD17C         | A | G | 0.3   | 0.002  | 0.0003 | 1.4e-11 | 0.002  | 0.0005 | 5.1e-06 |
| rs9257280   | 6  | 28833507  | HCG14           | T | C | 0.23  | 0.003  | 0.0004 | 2.6e-11 | 0.002  | 0.0005 | 0.0034  |
| rs6738113   | 2  | 135634581 | CCNT2-AS1       | A | G | 0.36  | 0.002  | 0.0003 | 4.6e-11 | 0.002  | 0.0005 | 7.7e-07 |
| rs10035289  | 5  | 153095918 | GRIA1           | G | A | 0.53  | 0.002  | 0.0003 | 9.0e-11 | 0.001  | 0.0004 | 0.0011  |
| rs147730268 | 12 | 123024476 | KNTC1           | T | G | 0.088 | 0.004  | 0.0006 | 9.6e-11 | 0.003  | 0.0008 | 0.00022 |
| rs72917544  | 2  | 175241566 | CIR1            | A | G | 0.19  | 0.003  | 0.0004 | 1.5e-10 | 0.003  | 0.0006 | 5.6e-06 |
| rs181617194 | 12 | 122011598 | KDM2B           | C | T | 0.041 | 0.005  | 0.0009 | 5.4e-10 | 0.004  | 0.0012 | 0.0035  |
| rs6265      | 11 | 27679916  | BDNF            | T | C | 0.19  | 0.002  | 0.0004 | 7.1e-10 | 0.002  | 0.0006 | 0.00061 |
| rs11236203  | 11 | 74378000  | POLD3           | G | T | 0.5   | -0.002 | 0.0003 | 8.4e-10 | -0.001 | 0.0004 | 0.0028  |
| rs2760975   | 6  | 32560771  | HLA-DRB1        | A | G | 0.17  | -0.003 | 0.0005 | 9.7e-10 | -0.003 | 0.0006 | 7.0e-06 |
| rs12367809  | 12 | 50256063  | ENSG00000257253 | T | C | 0.37  | -0.002 | 0.0003 | 1.2e-09 | -0.002 | 0.0005 | 1.7e-05 |
| rs4677611   | 3  | 71407890  | FOXP1           | T | C | 0.49  | 0.002  | 0.0003 | 1.3e-09 | 0.001  | 0.0004 | 0.0052  |
| rs11121529  | 1  | 10271688  | KIF1B           | G | C | 0.11  | -0.003 | 0.0005 | 2.1e-09 | -0.003 | 0.0007 | 0.00022 |
| rs113230003 | 19 | 18460956  | PGPEP1          | A | G | 0.26  | 0.002  | 0.0004 | 2.2e-09 | 0.002  | 0.0005 | 1.6e-05 |
| rs2439823   | 10 | 99778226  | CRTAC1          | G | A | 0.55  | -0.002 | 0.0003 | 2.6e-09 | -0.002 | 0.0004 | 2.7e-06 |
| rs6759321   | 2  | 136322676 | R3HDM1          | T | G | 0.24  | 0.002  | 0.0004 | 2.7e-09 | 0.003  | 0.0005 | 9.6e-07 |
| rs11766468  | 7  | 2082604   | MAD1L1          | A | G | 0.15  | 0.003  | 0.0004 | 2.8e-09 | 0.003  | 0.0006 | 4.1e-06 |
| rs11689199  | 2  | 100820421 | LINC01104       | G | A | 0.4   | 0.002  | 0.0003 | 3.1e-09 | 0.001  | 0.0005 | 0.005   |
| rs2307111   | 5  | 75003678  | POC5            | C | T | 0.39  | 0.002  | 0.0003 | 3.1e-09 | 0.002  | 0.0005 | 0.00024 |
| rs2053682   | 5  | 170599327 | RANBP17         | A | C | 0.68  | -0.002 | 0.0003 | 3.6e-09 | -0.002 | 0.0005 | 2.6e-05 |
| rs2206929   | 20 | 50899693  | RP4-723E3.1     | C | T | 0.29  | 0.002  | 0.0003 | 5.4e-09 | 0.001  | 0.0005 | 0.0088  |
| rs7955910   | 12 | 122654382 | LRRC43          | T | G | 0.48  | -0.002 | 0.0003 | 5.5e-09 | -0.001 | 0.0004 | 0.00085 |
| rs11594905  | 10 | 77659733  | C10orf11        | A | G | 0.14  | -0.003 | 0.0005 | 6.3e-09 | -0.002 | 0.0006 | 0.0094  |
| rs2625387   | 11 | 43613426  | MIR129-2        | A | G | 0.61  | 0.002  | 0.0003 | 9.7e-09 | 0.001  | 0.0005 | 0.0029  |
| rs9383061   | 6  | 15477610  | JARID2          | A | C | 0.32  | 0.002  | 0.0003 | 1.0e-08 | 0.002  | 0.0005 | 0.00098 |
| rs286818    | 5  | 107433446 | FBXL17          | A | T | 0.17  | 0.002  | 0.0004 | 1.1e-08 | 0.002  | 0.0006 | 0.00062 |
| rs12311114  | 12 | 124460703 | ZNF664:FAM101A  | A | C | 0.31  | -0.002 | 0.0003 | 1.2e-08 | -0.002 | 0.0005 | 8.0e-05 |
| rs1513475   | 3  | 35724256  | ARPP21          | C | T | 0.35  | 0.002  | 0.0003 | 1.4e-08 | 0.002  | 0.0005 | 0.00044 |

|             |    |           |               |   |   |      |        |        |         |        |        |         |
|-------------|----|-----------|---------------|---|---|------|--------|--------|---------|--------|--------|---------|
| rs4692996   | 4  | 94992328  | RP11-363G15.2 | C | T | 0.4  | 0.002  | 0.0003 | 1.4e-08 | 0.001  | 0.0005 | 0.002   |
| rs10807138  | 6  | 34184938  | CYCSP55       | A | G | 0.8  | 0.002  | 0.0004 | 1.7e-08 | 0.002  | 0.0006 | 0.0014  |
| rs117642368 | 17 | 43399058  | MAP3K14       | C | G | 0.11 | -0.003 | 0.0005 | 2.3e-08 | -0.002 | 0.0007 | 0.0072  |
| rs12507029  | 4  | 80853827  | ANTXR2        | T | C | 0.64 | 0.002  | 0.0003 | 2.7e-08 | 0.001  | 0.0005 | 0.0052  |
| rs12599952  | 16 | 72034653  | PKD1L3        | A | G | 0.32 | 0.002  | 0.0003 | 3.1e-08 | 0.002  | 0.0005 | 5.5e-06 |
| rs61872990  | 10 | 118649443 | ENO4:KIAA1598 | C | T | 0.17 | -0.002 | 0.0004 | 3.2e-08 | -0.002 | 0.0006 | 0.00027 |
| rs12475388  | 2  | 27039792  | CDKN2AIPNLP2  | A | G | 0.49 | 0.002  | 0.0003 | 3.4e-08 | 0.001  | 0.0004 | 0.00091 |
| rs28620278  | 15 | 56959028  | ZNF280D       | T | C | 0.4  | -0.002 | 0.0003 | 3.5e-08 | -0.002 | 0.0005 | 2.9e-05 |
| rs4952499   | 2  | 40381921  | SLC8A1-AS1    | T | C | 0.74 | -0.002 | 0.0004 | 4.5e-08 | -0.001 | 0.0005 | 0.0045  |

SNP associations ordered according to significance in discovery analysis.

SNP, single-nucleotide polymorphism; CHR, chromosome, EAF, effect allele frequency

| <b>Supplementary Table S2. Functional annotation of replicated single-nucleotide polymorphisms (SNPs).</b> |            |                 |                     |                                 |                 |             |            |                                                                                  |                                                                   |
|------------------------------------------------------------------------------------------------------------|------------|-----------------|---------------------|---------------------------------|-----------------|-------------|------------|----------------------------------------------------------------------------------|-------------------------------------------------------------------|
| <b>SNP</b>                                                                                                 | <b>CHR</b> | <b>Position</b> | <b>Nearest Gene</b> | <b>Distance to nearest gene</b> | <b>function</b> | <b>CADD</b> | <b>RDB</b> | <b>eQTL[aligned direction*]</b>                                                  | <b>OMIM</b>                                                       |
| rs1421085                                                                                                  | 16         | 53800954        | FTO                 | 0                               | intronic        | 14.77       | 5          |                                                                                  | Growth retardation, developmental delay, facial dysmorphism (FTO) |
| rs12928404                                                                                                 | 16         | 28847246        | ATXN2L              | 0                               | intronic        | 0.002       | 1b         | TUFM (Whole_Blood, Skin_Sun_Exposed_Lower_leg), SULT1A2 (Whole_Blood)            | Combined oxidative phosphorylation deficiency 4 (TUFM)            |
| rs13107325                                                                                                 | 4          | 103188709       | SLC39A8             | 0                               | exonic          | 34          | 5          |                                                                                  | Congenital disorder of glycosylation, type Iin (SLC39A8)          |
| rs10203386                                                                                                 | 2          | 25136866        | ADCY3               | 0                               | intronic        | 4.996       | 5          | ADCY3 (Whole_Blood, Nerve_Tibial), DNAJC27 (Whole_Blood)                         |                                                                   |
| rs543874                                                                                                   | 1          | 177889480       | ENSG00000254154     | 8443                            | intergenic      | 9.231       | 7          |                                                                                  |                                                                   |
| rs77226405                                                                                                 | 18         | 58077260        | MC4R                |                                 |                 | NA          | NA         |                                                                                  |                                                                   |
| rs6752706                                                                                                  | 2          | 629831          | TMEM18              | 37504                           | intergenic      | 5.877       | 6          |                                                                                  |                                                                   |
| rs2744475                                                                                                  | 6          | 50784880        | TFAP2B              | 1556                            | intergenic      | 3.794       | 5          |                                                                                  | Char syndrome, Patent ductus arteriosus 2 (TFAP2B)                |
| rs2814949                                                                                                  | 6          | 34656722        | C6orf106            | 0                               | intronic        | 1.61        | 6          | UHRF1BP1 (Artery_Tibial, Cells_Transformed_fibroblasts, Adipose_Subcutaneous)    |                                                                   |
| rs10871777                                                                                                 | 18         | 57851763        | ENSG00000267620     | 12025                           | intergenic      | 0.967       | 6          |                                                                                  |                                                                   |
| rs3821269                                                                                                  | 2          | 70698590        | TGFA                | 0                               | intronic        | 2.824       | NA         | TGFA (Testis)                                                                    | Alstrom syndrome, Orofacial cleft-2 (TGFA)                        |
| rs12225051                                                                                                 | 11         | 47571967        | CELF1               | 0                               | intronic        | 3.125       | 5          | C1QTNF4 (Adipose_Subcutaneous, Skin_Sun_Exposed_Lower_leg), MADD (Artery_Tibial) | Myotonic dystrophy 1 (CELF1)                                      |
| rs62106258                                                                                                 | 2          | 417167          | LINC01874           | 0                               | downstream      | 19.65       | 7          |                                                                                  |                                                                   |

|            |    |           |                 |        |                |       |    |                                                                     |                                                                       |
|------------|----|-----------|-----------------|--------|----------------|-------|----|---------------------------------------------------------------------|-----------------------------------------------------------------------|
| rs3810291  | 19 | 47569003  | ZC3H4           | 0      | UTR3           | 5.093 | 5  |                                                                     |                                                                       |
| rs1243188  | 10 | 21908803  | MLLT10          | 0      | intronic       | 1.58  | 7  |                                                                     | Leukemia, acute myeloid (MLLT10)                                      |
| rs2431112  | 5  | 103931707 | RP11-6N13.1     | 0      | ncRNA_intronic | 1.534 | NA |                                                                     |                                                                       |
| rs10788958 | 1  | 54040670  | GLIS1           | 0      | intronic       | 9.244 | 5  |                                                                     |                                                                       |
| rs78648104 | 6  | 50683009  | TFAP2D          | 0      | exonic         | 12.97 | 4  |                                                                     |                                                                       |
| rs660010   | 18 | 53310969  | TCF4            | 0      | intronic       | 0.072 | 7  |                                                                     | Corneal dystrophy, Fuchs endothelial, 3, Pitt-Hopkins syndrome (TCF4) |
| rs13130484 | 4  | 45175691  | ENSG00000248744 | 122022 | intergenic     | 6.336 | 7  |                                                                     |                                                                       |
| rs4549685  | 7  | 39326478  | POU6F2          | 0      | intronic       | 2.552 | 7  |                                                                     | Wilms tumor susceptibility-5 (POU6F2)                                 |
| rs17391694 | 1  | 78623626  | RNFT1P2         | 12539  | intergenic     | 2.61  | 1f | FUBP1 (Artery_Tibial, Esophagus_Mucosa, Skin_Sun_Exposed_Lower_leg) |                                                                       |
| rs6499240  | 16 | 69686912  | NFAT5           | 0      | intronic       | 0.681 | 6  | CLEC18A (Whole_Blood, Thyroid, Adipose_Subcutaneous)                |                                                                       |
| rs80135947 | 17 | 65836001  | BPTF            | 0      | intronic       | 0.031 | 6  |                                                                     | Alzheimer disease (BPTF)                                              |
| rs2430740  | 12 | 15041938  | C12orf60        | 0      | intronic       | NA    | NA | ERP27 (Skin_Sun_Exposed_Lower_leg, Thyroid), RP11-233G1.4 (Testis)  |                                                                       |
| rs2260051  | 6  | 31591918  | PRRC2A          | 0      | intronic       | NA    | NA |                                                                     |                                                                       |
| rs1556659  | 10 | 130834698 | ENSG00000232985 | 76372  | intergenic     | 4.304 | 5  |                                                                     |                                                                       |
| rs7165759  | 15 | 80988600  | ABHD17C         | 0      | intronic       | 7.572 | 4  |                                                                     |                                                                       |
| rs9257280  | 6  | 28833507  | HCG14           | 1100   | intergenic     | 4.58  | 4  | TRIM27 (Whole_Blood, Esophagus_Mucosa, Muscle_Skeletal)             |                                                                       |
| rs6738113  | 2  | 135634581 | CCNT2-AS1       | 0      | ncRNA_intronic | 2.154 | 6  | TMEM163 (Testis, Esophagus_Muscularis, Artery_Tibial)               |                                                                       |

|             |    |           |                 |      |                |       |    |                                                                           |                                                                                                                                 |
|-------------|----|-----------|-----------------|------|----------------|-------|----|---------------------------------------------------------------------------|---------------------------------------------------------------------------------------------------------------------------------|
| rs10035289  | 5  | 153095918 | GRIA1           | 0    | intronic       | 2.982 | 5  |                                                                           |                                                                                                                                 |
| rs147730268 | 12 | 123024476 | KNTC1           | 0    | intronic       | 0.894 | 6  |                                                                           |                                                                                                                                 |
| rs72917544  | 2  | 175241566 | CIR1            | 0    | intronic       | 12.16 | 6  |                                                                           |                                                                                                                                 |
| rs181617194 | 12 | 122011598 | KDM2B           | 0    | intronic       | 1.754 | 6  |                                                                           |                                                                                                                                 |
| rs6265      | 11 | 27679916  | BDNF            | 0    | exonic         | 24.1  | 6  | BDNF (Nerve_Tibial, Thyroid)                                              | Central hypoventilation syndrome, congenital (BDNF)                                                                             |
| rs11236203  | 11 | 74378000  | POLD3           | 0    | intronic       | 1.664 | 5  |                                                                           |                                                                                                                                 |
| rs2760975   | 6  | 32560771  | HLA-DRB1        | 3146 | upstream       | NA    | NA |                                                                           |                                                                                                                                 |
| rs12367809  | 12 | 50256063  | ENSG00000257253 | 0    | ncRNA_intronic | 0.633 | 7  | FAIM2 (Testis)                                                            |                                                                                                                                 |
| rs4677611   | 3  | 71407890  | FOXP1           | 0    | intronic       | 4.89  | 3a |                                                                           | Mental retardation with language impairment and with or without autistic features (FOXP1)                                       |
| rs11121529  | 1  | 10271688  | KIF1B           | 0    | UTR5           | 18.01 | 4  | KIF1B (Whole_Blood), PGD (Cells_Transformed_fibroblasts, Muscle_Skeletal) | Charcot-Marie-Tooth disease, type 2A1, Pheochromocytoma, Neuroblastoma, susceptibility to, 1 (KIF1B)                            |
| rs113230003 | 19 | 18460956  | PGPEP1          | 0    | intronic       | 0.291 | 6  |                                                                           |                                                                                                                                 |
| rs2439823   | 10 | 99778226  | CRTAC1          | 0    | intronic       | 0.3   | 5  |                                                                           |                                                                                                                                 |
| rs6759321   | 2  | 136322676 | R3HDM1          | 0    | intronic       | 1.432 | 7  | DARS (Thyroid), MCM6 (Cells_Transformed_fibroblasts), UBXM4 (Pancreas)    | Hypomyelination with brainstem and spinal cord involvement and leg spasticity (DARS), Lactase persistence/nonpersistence (MCM6) |
| rs11766468  | 7  | 2082604   | MAD1L1          | 0    | intronic       | 3.622 | 4  |                                                                           | Lymphoma, somatic, Prostate cancer, somatic (MAD1L1)                                                                            |
| rs11689199  | 2  | 100820421 | LINC01104       | 4295 | intergenic     | 4.346 | 5  | AFF3 (Artery_Aorta)                                                       |                                                                                                                                 |

|             |    |           |                |       |                |       |    |                                                                        |                                               |
|-------------|----|-----------|----------------|-------|----------------|-------|----|------------------------------------------------------------------------|-----------------------------------------------|
| rs2307111   | 5  | 75003678  | POC5           | 0     | exonic         | 0.049 | 5  | ANKDD1B (Nerve_Tibial, Thyroid), GCNT4 (Testis)                        |                                               |
| rs2053682   | 5  | 170599327 | RANBP17        | 0     | intronic       | 14.6  | 7  |                                                                        |                                               |
| rs2206929   | 20 | 50899693  | RP4-723E3.1    | 0     | ncRNA_intronic | 0.935 | NA | ZFP64 (Cells_Transformed_fibroblasts, Artery_Tibial)                   |                                               |
| rs7955910   | 12 | 122654382 | LRRC43         | 0     | intronic       | 0.54  | 7  | LRRC43 (Nerve_Tibial)                                                  |                                               |
| rs11594905  | 10 | 77659733  | C10orf11       | 0     | intronic       | 16.59 | 4  |                                                                        | Albinism, oculocutaneous, type VII (C10orf11) |
| rs2625387   | 11 | 43613426  | MIR129-2       | 10393 | intergenic     | 2.083 | NA | HSD17B12 (Skin_Sun_Exposed_Lower_leg, Thyroid, Artery_Tibial)          |                                               |
| rs9383061   | 6  | 15477610  | JARID2         | 0     | intronic       | 0.807 | 5  |                                                                        |                                               |
| rs286818    | 5  | 107433446 | FBXL17         | 0     | intronic       | 4.126 | 7  |                                                                        |                                               |
| rs12311114  | 12 | 124460703 | ZNF664:FAM101A | 0     | intronic       | 3.424 | 6  | CCDC92 (Heart_Left_Ventricle, Adipose_Subcutaneous), ZNF664 (Thyroid)  |                                               |
| rs1513475   | 3  | 35724256  | ARPP21         | 0     | intronic       | 2.243 | 7  | ARPP21 (Artery_Tibial, Artery_Aorta)                                   |                                               |
| rs4692996   | 4  | 94992328  | RP11-363G15.2  | 46615 | intergenic     | 0.646 | 7  |                                                                        |                                               |
| rs10807138  | 6  | 34184938  | CYCSP55        | 2278  | intergenic     | 2.707 | 7  |                                                                        |                                               |
| rs117642368 | 17 | 43399058  | MAP3K14        | 4644  | intergenic     | 1.227 | 4  | CRHR1 (Cells_Transformed_fibroblasts, Adipose_Subcutaneous, Lung)      |                                               |
| rs12507029  | 4  | 80853827  | ANTXR2         | 0     | intronic       | 2.539 | 7  |                                                                        | Hyaline fibromatosis syndrome (ANTXR2)        |
| rs12599952  | 16 | 72034653  | PKD1L3         | 0     | upstream       | 0.467 | 7  | DHODH (Artery_Tibial, Nerve_Tibial, Cells_Transformed_fibroblasts)     | Miller syndrome (DHODH)                       |
| rs61872990  | 10 | 118649443 | ENO4:KIAA1598  | 0     | intronic       | 2.942 | 6  | KIAA1598 (Whole_Blood, Cells_Transformed_fibroblasts)                  |                                               |
| rs12475388  | 2  | 27039792  | CDKN2AIPNLP2   | 10245 | intergenic     | 1.724 | 4  | KHK (Skin_Sun_Exposed_Lower_leg), MAPRE3 (Skin_Sun_Exposed_Lower_leg), | Fructosuria (KHK)                             |



|                                                                                                                                                                                                                                                                                                                                                                                                                                          |    |          |            |   |                |       |   | DPYSL5 (Brain_Cerebellum) |  |
|------------------------------------------------------------------------------------------------------------------------------------------------------------------------------------------------------------------------------------------------------------------------------------------------------------------------------------------------------------------------------------------------------------------------------------------|----|----------|------------|---|----------------|-------|---|---------------------------|--|
| rs28620278                                                                                                                                                                                                                                                                                                                                                                                                                               | 15 | 56959028 | ZNF280D    | 0 | exonic         | 2.125 | 7 |                           |  |
| rs4952499                                                                                                                                                                                                                                                                                                                                                                                                                                | 2  | 40381921 | SLC8A1-AS1 | 0 | ncRNA_intronic | 12.86 | 7 |                           |  |
| <p>* The direction of effect to gene expression after aligning risk increasing allele of GWAS and tested allele of eQTLs; "+" when the risk increasing allele increase the expression of the gene, "-" when the risk increasing allele decrease the expression of the gene.<br/>           CHR, chromosome; CADD, Combined Annotation Dependent Depletion; RBD, Regulome database score; NA, information not available for this SNP.</p> |    |          |            |   |                |       |   |                           |  |

**Supplementary Table S3. Genetic loci associated with grip strength in meta-analysis.**

| SNP        | CHR | position  | Nearest gene | Effect allele | Other allele | EAF    | Beta   | Se     | P-value |
|------------|-----|-----------|--------------|---------------|--------------|--------|--------|--------|---------|
| rs11642015 | 16  | 53802494  | FTO          | T             | C            | 0.4023 | -0.004 | 0.0003 | 7.5e-49 |
| rs62037364 | 16  | 28868695  | SH2B1        | A             | G            | 0.4076 | -0.003 | 0.0003 | 2.2e-26 |
| rs13135092 | 4   | 103198082 | SLC39A8      | A             | G            | 0.9169 | 0.005  | 0.0005 | 3.2e-26 |
| rs10203386 | 2   | 25136866  | ADCY3        | A             | T            | 0.452  | -0.003 | 0.0003 | 1.6e-23 |
| rs35142762 | 2   | 636790    | TMEM18       | T             | C            | 0.8282 | -0.004 | 0.0004 | 5.4e-22 |
| rs539515   | 1   | 177889025 | SEC16B       | A             | C            | 0.7924 | 0.003  | 0.0003 | 3.1e-21 |
| rs62107261 | 2   | 422144    | FAM150B      | T             | C            | 0.9518 | -0.006 | 0.0007 | 7.8e-21 |
| rs2744475  | 6   | 50784880  | TFAP2B       | C             | G            | 0.7084 | 0.003  | 0.0003 | 1.5e-20 |
| rs2726036  | 16  | 28347140  | NPIP6        | A             | C            | 0.5991 | 0.003  | 0.0003 | 3.4e-20 |
| rs34633411 | 18  | 57854694  | MC4R         | T             | C            | 0.2374 | -0.003 | 0.0003 | 2.1e-19 |
| rs11039266 | 11  | 47532395  | CELF1        | T             | G            | 0.7219 | -0.003 | 0.0003 | 2.7e-18 |
| rs8073510  | 17  | 65839210  | BPTF         | A             | G            | 0.8045 | 0.003  | 0.0004 | 1.3e-16 |
| rs1243182  | 10  | 21916728  | MLLT10       | T             | C            | 0.3108 | -0.002 | 0.0003 | 3.5e-16 |
| rs11645565 | 16  | 69896248  | WWP2         | A             | G            | 0.4308 | -0.002 | 0.0003 | 7.1e-16 |
| rs2260051  | 6   | 31591918  | PRRC2A       | A             | T            | 0.4425 | 0.002  | 0.0003 | 1.0e-15 |
| rs2431112  | 5   | 103931707 | NUDT12       | A             | G            | 0.4407 | -0.002 | 0.0003 | 2.2e-15 |
| rs9469899  | 6   | 34793124  | UHRF1BP1     | A             | G            | 0.3572 | -0.002 | 0.0003 | 2.5e-15 |
| rs1642294  | 18  | 53374913  | TCF4         | C             | G            | 0.145  | 0.003  | 0.0004 | 5.9e-15 |
| rs3771498  | 2   | 70720070  | TGFA         | T             | C            | 0.5169 | 0.002  | 0.0003 | 1.4e-14 |
| rs4549685  | 7   | 39326478  | POU6F2       | T             | C            | 0.3305 | 0.002  | 0.0003 | 4.5e-14 |
| rs6711390  | 2   | 135629439 | ACMSD        | T             | C            | 0.3604 | 0.002  | 0.0003 | 6.0e-14 |
| rs11873305 | 18  | 58049192  | MC4R         | A             | C            | 0.9608 | -0.005 | 0.0007 | 8.9e-14 |
| rs1556659  | 10  | 130834698 | MGMT         | T             | C            | 0.3832 | 0.002  | 0.0003 | 1.0e-13 |
| rs7165759  | 15  | 80988600  | ABHD17C      | A             | G            | 0.2981 | 0.002  | 0.0003 | 1.3e-13 |
| rs62512210 | 8   | 116623548 | TRPS1        | T             | C            | 0.9142 | -0.004 | 0.0005 | 1.9e-13 |
| rs7571826  | 2   | 230623127 | DNER         | T             | C            | 0.3275 | -0.002 | 0.0003 | 3.7e-13 |

|             |    |           |          |   |   |        |        |        |         |
|-------------|----|-----------|----------|---|---|--------|--------|--------|---------|
| rs11671304  | 19 | 47564643  | TMEM160  | T | C | 0.6729 | -0.002 | 0.0003 | 4.1e-13 |
| rs72917544  | 2  | 175241566 | CIR1     | A | G | 0.1861 | 0.003  | 0.0004 | 9.3e-13 |
| rs13130484  | 4  | 45175691  | GNPDA2   | T | C | 0.4333 | -0.002 | 0.0003 | 1.0e-12 |
| rs2287226   | 12 | 14987096  | ART4     | A | G | 0.6019 | 0.002  | 0.0003 | 1.2e-12 |
| rs6759321   | 2  | 136322676 | R3HDM1   | T | G | 0.2402 | 0.002  | 0.0003 | 2.4e-12 |
| rs34517439  | 1  | 78450517  | GIPC2    | A | C | 0.1247 | -0.003 | 0.0004 | 2.5e-12 |
| rs563296    | 10 | 99772404  | CRTAC1   | A | G | 0.5598 | -0.002 | 0.0003 | 3.4e-12 |
| rs10788958  | 1  | 54040670  | GLIS1    | C | G | 0.3512 | -0.002 | 0.0003 | 3.7e-12 |
| rs10846071  | 12 | 15016236  | NA       | T | C | 0.3949 | -0.002 | 0.0003 | 3.8e-12 |
| rs2760975   | 6  | 32560771  | HLA-DRB1 | A | G | 0.168  | -0.003 | 0.0004 | 5.1e-12 |
| rs11766468  | 7  | 2082604   | MAD1L1   | A | G | 0.1467 | 0.003  | 0.0004 | 7.8e-12 |
| rs113315602 | 6  | 32574575  | HLA-DRB1 | A | C | 0.9027 | 0.003  | 0.0005 | 9.1e-12 |
| rs245774    | 5  | 170530930 | RANBP17  | A | G | 0.2717 | 0.002  | 0.0003 | 1.2e-11 |
| rs12367809  | 12 | 50256063  | BCDIN3D  | T | C | 0.3684 | -0.002 | 0.0003 | 1.2e-11 |
| rs147730268 | 12 | 123024476 | KNTC1    | T | G | 0.0883 | 0.003  | 0.0005 | 1.8e-11 |
| rs113230003 | 19 | 18460956  | PGPEP1   | A | G | 0.2596 | 0.002  | 0.0003 | 1.9e-11 |
| rs2213581   | 6  | 32388546  | BTNL2    | T | C | 0.2346 | 0.002  | 0.0003 | 2.4e-11 |
| rs7755875   | 6  | 28854059  | TRIM27   | A | G | 0.3193 | 0.002  | 0.0003 | 2.6e-11 |
| rs12910459  | 15 | 56998196  | ZNF280D  | T | C | 0.4326 | -0.002 | 0.0003 | 3.1e-11 |
| rs2126165   | 5  | 153167595 | GRIA1    | A | G | 0.4889 | -0.002 | 0.0003 | 3.8e-11 |
| rs41268905  | 6  | 32097611  | FKBPL    | A | G | 0.1048 | -0.003 | 0.0005 | 4.1e-11 |
| rs56068671  | 6  | 50597378  | TFAP2D   | T | G | 0.0832 | 0.003  | 0.0005 | 5.5e-11 |
| rs12599952  | 16 | 72034653  | DHODH    | A | G | 0.3217 | 0.002  | 0.0003 | 7.3e-11 |
| rs62253653  | 3  | 53013267  | SFMBT1   | A | G | 0.7036 | -0.002 | 0.0003 | 9.5e-11 |
| rs4575361   | 12 | 124410529 | CCDC92   | A | T | 0.689  | 0.002  | 0.0003 | 1.2e-10 |
| rs879620    | 16 | 4015729   | ADCY9    | T | C | 0.6152 | -0.002 | 0.0003 | 1.2e-10 |

|             |    |           |          |   |   |        |        |        |         |
|-------------|----|-----------|----------|---|---|--------|--------|--------|---------|
| rs1454687   | 3  | 94038085  | DHFRL1   | C | G | 0.4846 | -0.002 | 0.0003 | 1.9e-10 |
| rs11121542  | 1  | 10393920  | KIF1B    | A | G | 0.122  | -0.003 | 0.0004 | 2.8e-10 |
| rs34916901  | 6  | 26286149  | HIST1H4H | T | G | 0.5116 | 0.002  | 0.0003 | 3.2e-10 |
| rs3847479   | 10 | 118833263 | NA       | A | G | 0.1744 | -0.002 | 0.0004 | 4.2e-10 |
| rs12691307  | 16 | 29939877  | KCTD13   | A | G | 0.4398 | 0.002  | 0.0003 | 5.6e-10 |
| rs62004866  | 15 | 74223118  | LOXL1    | C | G | 0.8865 | 0.003  | 0.0004 | 5.6e-10 |
| rs12195114  | 6  | 26708207  | NA       | A | G | 0.7513 | -0.002 | 0.0003 | 6.5e-10 |
| rs35511257  | 6  | 32545392  | HLA-DRB1 | C | G | 0.0956 | -0.003 | 0.0005 | 7.2e-10 |
| rs2237149   | 6  | 15412065  | JARID2   | A | C | 0.4131 | 0.002  | 0.0003 | 7.5e-10 |
| rs34341     | 5  | 74934009  | ANKDD1B  | A | T | 0.4242 | 0.002  | 0.0003 | 8.4e-10 |
| rs11030104  | 11 | 27684517  | BDNF     | A | G | 0.7964 | -0.002 | 0.0003 | 8.7e-10 |
| rs115131074 | 7  | 69238493  | AUTS2    | A | T | 0.0481 | -0.004 | 0.0007 | 9.0e-10 |
| rs72977282  | 11 | 74300441  | POLD3    | A | T | 0.4132 | -0.002 | 0.0003 | 9.0e-10 |
| rs73728611  | 6  | 32589363  | HLA-DQA1 | A | G | 0.8765 | 0.003  | 0.0004 | 9.9e-10 |
| rs181617194 | 12 | 122011598 | KDM2B    | T | C | 0.9588 | -0.005 | 0.0008 | 1.2e-09 |
| rs7955910   | 12 | 122654382 | LRRC43   | T | G | 0.4825 | -0.002 | 0.0003 | 1.4e-09 |
| rs1513475   | 3  | 35724256  | ARPP21   | T | C | 0.6516 | -0.002 | 0.0003 | 1.5e-09 |
| rs40067     | 5  | 107439012 | FBXL17   | A | G | 0.1702 | 0.002  | 0.0004 | 1.6e-09 |
| rs4776614   | 15 | 73082468  | ADPGK    | C | G | 0.3268 | 0.002  | 0.0003 | 1.9e-09 |
| rs7249      | 19 | 18391171  | JUND     | T | C | 0.3669 | 0.002  | 0.0003 | 2.0e-09 |
| rs1951716   | 14 | 94007075  | UNC79    | T | C | 0.634  | -0.002 | 0.0003 | 2.4e-09 |
| rs62442203  | 7  | 28829253  | CREB5    | C | G | 0.4039 | 0.002  | 0.0003 | 2.7e-09 |
| rs58383713  | 4  | 80796055  | ANTXR2   | A | C | 0.196  | -0.002 | 0.0004 | 3.1e-09 |
| rs11223444  | 11 | 133221928 | OPCML    | A | G | 0.4476 | -0.002 | 0.0003 | 3.2e-09 |
| rs4677611   | 3  | 71407890  | FOXP1    | T | C | 0.4877 | 0.002  | 0.0003 | 3.2e-09 |
| rs10807136  | 6  | 34178558  | HMGA1    | T | C | 0.1197 | -0.003 | 0.0004 | 3.3e-09 |

|             |    |           |          |   |   |        |        |        |         |
|-------------|----|-----------|----------|---|---|--------|--------|--------|---------|
| rs1627854   | 2  | 26953540  | KCNK3    | A | G | 0.528  | 0.002  | 0.0003 | 3.5e-09 |
| rs202941    | 14 | 27686205  | NOVA1    | T | C | 0.6156 | 0.002  | 0.0003 | 4.2e-09 |
| rs12447992  | 16 | 64518662  | CDH11    | A | C | 0.8651 | -0.002 | 0.0004 | 4.7e-09 |
| rs76808502  | 2  | 145631179 | ZEB2     | C | G | 0.0291 | 0.005  | 0.0009 | 5.2e-09 |
| rs117108573 | 6  | 32489679  | HLA-DRB5 | T | C | 0.0816 | -0.003 | 0.0005 | 5.6e-09 |
| rs11689199  | 2  | 100820421 | AFF3     | A | G | 0.5978 | -0.002 | 0.0003 | 5.7e-09 |
| rs4755720   | 11 | 43628749  | HSD17B12 | T | C | 0.6084 | 0.002  | 0.0003 | 6.2e-09 |
| rs1039716   | 1  | 215566593 | KCTD3    | T | C | 0.7829 | 0.002  | 0.0003 | 6.5e-09 |
| rs10279237  | 7  | 69868489  | AUTS2    | T | C | 0.8003 | 0.002  | 0.0004 | 6.5e-09 |
| rs7658243   | 4  | 94995978  | SMARCAD1 | A | C | 0.5768 | -0.002 | 0.0003 | 6.6e-09 |
| rs529200    | 3  | 173114305 | NLGN1    | A | G | 0.4741 | 0.002  | 0.0003 | 6.7e-09 |
| rs61873510  | 10 | 102626510 | FAM178A  | T | G | 0.3287 | -0.002 | 0.0003 | 7.7e-09 |
| rs4858934   | 3  | 88224304  | CGGBP1   | T | C | 0.1147 | 0.002  | 0.0004 | 8.7e-09 |
| rs3134986   | 6  | 32644553  | NA       | T | C | 0.2899 | -0.002 | 0.0003 | 9.1e-09 |
| rs66679256  | 4  | 18351898  | LCORL    | T | C | 0.4461 | -0.002 | 0.0003 | 9.2e-09 |
| rs13132853  | 4  | 38680015  | KLF3     | A | G | 0.6352 | -0.002 | 0.0003 | 9.3e-09 |
| rs207299    | 4  | 19096263  | LCORL    | T | C | 0.2738 | 0.002  | 0.0003 | 9.6e-09 |
| rs61992671  | 14 | 101531854 | NA       | A | G | 0.5063 | -0.002 | 0.0003 | 9.7e-09 |
| rs1523766   | 3  | 77670448  | ROBO2    | A | G | 0.4979 | -0.002 | 0.0003 | 1.0e-08 |
| rs17249398  | 4  | 102507114 | BANK1    | A | G | 0.0272 | -0.005 | 0.0009 | 1.2e-08 |
| rs77012907  | 2  | 24794214  | NCOA1    | A | G | 0.9098 | 0.003  | 0.0005 | 1.2e-08 |
| rs7231880   | 18 | 57967186  | MC4R     | T | G | 0.7065 | 0.002  | 0.0003 | 1.2e-08 |
| rs1529883   | 15 | 47916872  | SEMA6D   | C | G | 0.3453 | 0.002  | 0.0003 | 1.3e-08 |
| rs3113767   | 4  | 181536946 | TENM3    | T | C | 0.845  | 0.002  | 0.0004 | 1.3e-08 |
| rs6904571   | 6  | 40349366  | LRFN2    | T | C | 0.2588 | 0.002  | 0.0003 | 1.3e-08 |
| rs887013    | 7  | 39427769  | POU6F2   | A | T | 0.6818 | 0.002  | 0.0003 | 1.4e-08 |

|             |    |           |          |   |   |        |        |        |         |
|-------------|----|-----------|----------|---|---|--------|--------|--------|---------|
| rs9320823   | 6  | 98429337  | MMS22L   | T | C | 0.3981 | 0.002  | 0.0003 | 1.4e-08 |
| rs9579775   | 13 | 20616557  | ZMYM2    | A | C | 0.8646 | 0.002  | 0.0004 | 1.4e-08 |
| rs9877408   | 3  | 81974558  | GBE1     | A | G | 0.5984 | 0.002  | 0.0003 | 1.4e-08 |
| rs17024393  | 1  | 110154688 | GNAT2    | T | C | 0.9742 | 0.005  | 0.0009 | 1.5e-08 |
| rs2206929   | 20 | 50899693  | ZFP64    | T | C | 0.7096 | -0.002 | 0.0003 | 1.5e-08 |
| rs11084110  | 19 | 52220077  | NA       | T | C | 0.7068 | 0.002  | 0.0003 | 1.6e-08 |
| rs453325    | 6  | 29906313  | HLA-A    | A | C | 0.7549 | -0.002 | 0.0003 | 1.6e-08 |
| rs5750673   | 22 | 39110124  | GTPBP1   | A | G | 0.2776 | -0.002 | 0.0003 | 1.7e-08 |
| rs805343    | 2  | 54193193  | PSME4    | T | C | 0.475  | -0.002 | 0.0003 | 1.7e-08 |
| rs12680855  | 8  | 95582655  | KIAA1429 | A | G | 0.6826 | -0.002 | 0.0003 | 1.8e-08 |
| rs10758232  | 9  | 33775652  | PRSS3    | C | G | 0.6653 | 0.002  | 0.0003 | 2.0e-08 |
| rs303760    | 18 | 21083738  | C18orf8  | T | C | 0.346  | -0.002 | 0.0003 | 2.0e-08 |
| rs329120    | 5  | 133861756 | JADE2    | T | C | 0.418  | 0.002  | 0.0003 | 2.2e-08 |
| rs3843540   | 7  | 99126640  | ZKSCAN5  | T | C | 0.8514 | -0.002 | 0.0004 | 2.3e-08 |
| rs17769552  | 17 | 43927290  | SPPL2C   | A | G | 0.2235 | -0.002 | 0.0003 | 2.3e-08 |
| rs6905419   | 6  | 12945093  | PHACTR1  | T | C | 0.2814 | -0.002 | 0.0003 | 2.4e-08 |
| rs4886869   | 15 | 77799657  | HMG20A   | A | G | 0.3902 | 0.002  | 0.0003 | 2.5e-08 |
| rs6424971   | 1  | 185110367 | TRMT1L   | T | C | 0.4829 | 0.002  | 0.0003 | 2.5e-08 |
| rs73077175  | 3  | 49774658  | IP6K1    | A | G | 0.3329 | 0.002  | 0.0003 | 2.6e-08 |
| rs901850    | 3  | 4758586   | ITPR1    | T | G | 0.256  | 0.002  | 0.0003 | 2.9e-08 |
| rs9641509   | 7  | 113622594 | PPP1R3A  | T | G | 0.6135 | 0.002  | 0.0003 | 3.1e-08 |
| rs4452060   | 19 | 45347911  | PVRL2    | A | C | 0.42   | 0.002  | 0.0003 | 3.3e-08 |
| rs2044469   | 2  | 174961488 | OLA1     | A | G | 0.6525 | 0.002  | 0.0003 | 3.3e-08 |
| rs117642368 | 17 | 43399058  | SPATA32  | C | G | 0.1073 | -0.002 | 0.0005 | 3.4e-08 |
| rs4952499   | 2  | 40381921  | SLC8A1   | T | C | 0.7403 | -0.002 | 0.0003 | 3.4e-08 |
| rs12055409  | 6  | 33801510  | MLN      | A | G | 0.3428 | -0.002 | 0.0003 | 3.5e-08 |

|                                                                                    |    |           |         |   |   |        |        |        |         |
|------------------------------------------------------------------------------------|----|-----------|---------|---|---|--------|--------|--------|---------|
| rs143373756                                                                        | 5  | 153467446 | MFAP3   | C | G | 0.9812 | -0.006 | 0.0011 | 3.7e-08 |
| rs13017251                                                                         | 2  | 44221160  | LRPPRC  | A | G | 0.494  | 0.002  | 0.0003 | 3.8e-08 |
| rs74550407                                                                         | 18 | 58058029  | MC4R    | A | T | 0.0375 | 0.004  | 0.0007 | 3.8e-08 |
| rs830643                                                                           | 3  | 71667063  | FOXP1   | A | G | 0.4138 | 0.002  | 0.0003 | 4.0e-08 |
| rs1521624                                                                          | 15 | 79412399  | RASGRF1 | A | C | 0.4716 | 0.002  | 0.0003 | 4.0e-08 |
| rs6428601                                                                          | 1  | 91231085  | BARHL2  | A | C | 0.4549 | 0.002  | 0.0003 | 4.3e-08 |
| rs1329733                                                                          | 9  | 92208227  | GADD45G | A | G | 0.5243 | 0.002  | 0.0003 | 4.3e-08 |
| rs12162265                                                                         | 19 | 13955161  | NANOS3  | A | G | 0.2384 | -0.002 | 0.0003 | 4.6e-08 |
| rs9968060                                                                          | 3  | 62471282  | CADPS   | T | C | 0.6456 | -0.002 | 0.0003 | 4.7e-08 |
| SNP, single-nucleotide polymorphism; CHR, chromosome, EAF, effect allele frequency |    |           |         |   |   |        |        |        |         |

**Supplementary Table S4. Results from two-sample Mendelian Randomization analysis for grip strength and coronary heart disease.**

| Method                    | All SNPs             |         | Heterogenic SNPs removed |         |
|---------------------------|----------------------|---------|--------------------------|---------|
|                           | OR (95% CI)          | P-value | OR (95% CI)              | P-value |
| Simple median             | 0.61 ( 0.51 , 0.74 ) | <0.0001 | 0.65 ( 0.53 , 0.78 )     | <0.0001 |
| Weighted median           | 0.52 ( 0.43 , 0.63 ) | <0.0001 | 0.65 ( 0.54 , 0.79 )     | <0.0001 |
| Penalized weighted median | 0.52 ( 0.43 , 0.63 ) | <0.0001 | 0.64 ( 0.53 , 0.77 )     | <0.0001 |
| IVW                       | 0.59 ( 0.49 , 0.71 ) | <0.0001 | 0.69 ( 0.60 , 0.79 )     | <0.0001 |
| Penalized IVW             | 0.59 ( 0.52 , 0.67 ) | <0.0001 | 0.66 ( 0.58 , 0.76 )     | <0.0001 |
| Robust IVW                | 0.58 ( 0.49 , 0.68 ) | <0.0001 | 0.68 ( 0.59 , 0.78 )     | <0.0001 |
| Penalized robust IVW      | 0.59 ( 0.51 , 0.68 ) | <0.0001 | 0.66 ( 0.58 , 0.76 )     | <0.0001 |
| MR-Egger                  | 0.36 ( 0.19 , 0.69 ) | 0.002   | 0.52 ( 0.31 , 0.87 )     | 0.013   |
| Penalized MR-Egger        | 0.41 ( 0.26 , 0.65 ) | <0.0001 | 0.50 ( 0.31 , 0.82 )     | 0.006   |
| Robust MR-Egger           | 0.41 ( 0.25 , 0.67 ) | <0.0001 | 0.50 ( 0.30 , 0.81 )     | 0.006   |
| Penalized robust MR-Egger | 0.41 ( 0.26 , 0.63 ) | <0.0001 | 0.49 ( 0.31 , 0.76 )     | 0.002   |

Abbreviations: SNP, single nucleotide polymorphism; IVW, inverse-variance weighted; MR, Mendelian Randomization; OR, odds ratio; CI, confidence interval.



**Supplementary Table S5. Results from two-sample Mendelian Randomization analysis for grip strength and atrial fibrillation.**

| Method                                                                                                                                                    | All SNPs             |         | Heterogenic SNPs removed |         |
|-----------------------------------------------------------------------------------------------------------------------------------------------------------|----------------------|---------|--------------------------|---------|
|                                                                                                                                                           | OR (95% CI)          | P-value | OR (95% CI)              | P-value |
| Simple median                                                                                                                                             | 0.69 ( 0.53 , 0.89 ) | 0.005   | 0.75 ( 0.58 , 0.97 )     | 0.028   |
| Weighted median                                                                                                                                           | 0.64 ( 0.49 , 0.82 ) | <0.0001 | 0.67 ( 0.52 , 0.86 )     | 0.002   |
| Penalized weighted median                                                                                                                                 | 0.64 ( 0.50 , 0.83 ) | 0.001   | 0.67 ( 0.52 , 0.86 )     | 0.002   |
| IVW                                                                                                                                                       | 0.69 ( 0.57 , 0.84 ) | <0.0001 | 0.75 ( 0.62 , 0.90 )     | 0.003   |
| Penalized IVW                                                                                                                                             | 0.74 ( 0.62 , 0.88 ) | <0.0001 | 0.77 ( 0.65 , 0.92 )     | 0.002   |
| Robust IVW                                                                                                                                                | 0.71 ( 0.58 , 0.88 ) | 0.002   | 0.75 ( 0.62 , 0.91 )     | 0.005   |
| Penalized robust IVW                                                                                                                                      | 0.73 ( 0.61 , 0.88 ) | 0.001   | 0.76 ( 0.63 , 0.91 )     | 0.004   |
| MR-Egger                                                                                                                                                  | 0.35 ( 0.17 , 0.70 ) | 0.003   | 0.40 ( 0.19 , 0.84 )     | 0.015   |
| Penalized MR-Egger                                                                                                                                        | 0.32 ( 0.17 , 0.58 ) | <0.0001 | 0.42 ( 0.21 , 0.82 )     | 0.011   |
| Robust MR-Egger                                                                                                                                           | 0.30 ( 0.12 , 0.76 ) | 0.011   | 0.38 ( 0.14 , 1.00 )     | 0.05    |
| Penalized robust MR-Egger                                                                                                                                 | 0.28 ( 0.11 , 0.71 ) | 0.007   | 0.39 ( 0.15 , 1.03 )     | 0.058   |
| Abbreviations: SNP, single nucleotide polymorphism; IVW, inverse-variance weighted; MR, Mendelian Randomization; OR, odds ratio; CI, confidence interval. |                      |         |                          |         |
